# Supplementary material for: Autoantibody status according to multiparametric assay accurately estimates connective tissue disease classification and identifies clinically relevant disease clusters
Source: PubMed Central journal article supplement — RMD Open. 2023 Sep 21;9(3):e003365. doi: 10.1136/rmdopen-2023-003365 (PMC10514657; doi:10.1136/rmdopen-2023-003365), 2023-09-21
Supplement: rmdopen-2023-003365supp001.pdf [file rmdopen-2023-003365supp001.pdf]

**Supplementary Table 1.** Percentage of data availability in the cohort for variables with missing data.

|                                                   |         |
|---------------------------------------------------|---------|
| Age                                               | 95.7%   |
| Anti-dsDNA (not including those assessed by PMAT) | 92.8%   |
| ACLA IgG                                          | 80.1%   |
| ACLA IgM                                          | 79.5%   |
| Anti-β2-gpI IgG                                   | 75.3%   |
| Anti-β2-gpI IgM                                   | 75.3%   |
| LAC                                               | 67.5%   |
| Ongoing GC                                        | 99.5%   |
| Ongoing HCQ                                       | 99.3%   |
| Ongoing MTX                                       | 99.2%   |
| Ongoing AZA                                       | 99.3%   |
| ANA positivity                                    | 95.6% * |
| * 100% for SLE and UCTD                           |         |

**Supplementary Table 2.** Autoantibody titres among the four clusters identified. Data are shown as median (interquartile range)

|                   | <b>Cluster 1<br/>n=47</b> | <b>Cluster 2<br/>n=174</b> | <b>Cluster 3<br/>N=582</b> | <b>Cluster 4<br/>N=21</b> | <b>p</b> |
|-------------------|---------------------------|----------------------------|----------------------------|---------------------------|----------|
| Age               | 43 (30-59)                | 54 (43-66)                 | 51 (32-64)                 | 55 (48-70)                | 0.003    |
| ANA titre         | 1:640 (1:160-1:1280)      | 1:640 (1:320-1:640)        | 1:640(1:160-1:640)         | 1:160 (1:160-1:320)       | < 0.001  |
| Anti-BICD2        | 0.1 (0.1-0.3)             | 0.1 (0.1-0.1)              | 0.1 (0.1-0.1)              | 0.1 (0.1-0.1)             | < 0.001  |
| Anti-fibrillarlin | 0.4 (0.2-0.7)             | 0.3 (0.2-0.4)              | 0.3 (0.2-0.4)              | 0.3 (0.2-0.5)             | < 0.001  |
| Anti-Ku           | 0.2 (0.1-1.3)             | 0.1 (0.1-0.1)              | 0.1 (0.1-0.1)              | 0.1 (0.1-0.1)             | < 0.001  |
| Anti-PM1-A        | 0.1 (0.1-0.2)             | 0.1 (0.1-0.1)              | 0.1 (0.1-0.1)              | 0.1 (0.1-0.2)             | < 0.001  |
| Anti-RNA pol III  | 0.2 (0.1-0.2)             | 0.1 (0.1-0.2)              | 0.1 (0.1-0.2)              | 0.1 (0.1-0.1)             | < 0.001  |
| Anti-Th/To RPP25  | 0.1 (0.1-0.1)             | 0.1 (0.1-0.1)              | 0.1 (0.1-0.1)              | 0.1 (0.1-0.1)             | < 0.001  |
| Anti-Th/To RPP38  | 0.1 (0.1-0.2)             | 0.0 (0.0-0.1)              | 0.0 (0.0-0.1)              | 0.0 (0.0-0.1)             | < 0.001  |
| Anti-dsDNA        | 11.9 (0.8-116.3)          | 0.5 (0.2-2.4)              | 0.5 (0.2-1.7)              | 0.3 (0.2-0.7)             | < 0.001  |
| Anti-RNP          | 1.6 (0.2-15.5)            | 0.3 (0.2-0.8)              | 0.2 (0.1-0.7)              | 0.1 (0.1-0.3)             | < 0.001  |
| Anti-Sm           | 0.4 (0.1-3.0)             | 0.3 (0.2-0.4)              | 0.2 (0.1-0.2)              | 0.2 (0.2-0.2)             | < 0.001  |
| Anti-Ro52         | 1.0 (0.4-167.5)           | 196.3 (192.4-196.3)        | 0.2 (0.1-0.6)              | 8.6 (0.3-161.9)           | < 0.001  |
| Anti-Ro60         | 7.8 (0.9-583.7)           | 583.7 (389.2-583.7)        | 0.4 (0.2-2.3)              | 0.5 (0.1-4.7)             | < 0.001  |
| Anti-La           | 1.5 (0.3-12.3)            | 34.1 (8.0-195.8)           | 0.3 (0.2-0.7)              | 0.2 (0.2-0.6)             | < 0.001  |
| Anti-Scl70        | 0.6 (0.3-2.1)             | 0.3 (0.2-0.4)              | 0.3 (0.2-0.6)              | 0.2 (0.2-0.4)             | 0.005    |
| Anti-Jo1 (test 1) | 0.1 (0.1-0.2)             | 0.1 (0.1-0.1)              | 0.1 (0.0-0.1)              | 153.6 (153.6-153.6)       | < 0.001  |
| Anti-CENP         | 0.7 (0.3-1.1)             | 0.6 (0.4-0.9)              | 0.5 (0.3-1.1)              | 0.4 (0.2-1.1)             | 0.208    |
| Anti-DFS70        | 0.1 (0.0-0.1)             | 0.1 (0.0-0.1)              | 0.1 (0.0-0.1)              | 0.1 (0.0-0.2)             | 0.08     |
| Anti-Rib P        | 0.4 (0.1-7.2)             | 0.1 (0.1-0.2)              | 0.1 (0.1-0.3)              | 0.1 (0.1-0.2)             | < 0.001  |
| Anti-EJ           | 0.1 (0.1-0.2)             | 0.1 (0.1-0.2)              | 0.1 (0.1-0.1)              | 0.1 (0.1-0.2)             | < 0.001  |
| Anti-HMGCR        | 0.1 (0.1-0.1)             | 0.1 (0.0-0.1)              | 0.1 (0.0-0.1)              | 0.1 (0.1-0.1)             | 0.102    |
| Anti-Jo1 (test 2) | 0.0 (0.0-0.1)             | 0.0 (0.0-0.0)              | 0.0 (0.0-0.0)              | 10.7 (8.8-11.5)           | < 0.001  |
| Anti-MDA5         | 0.1 (0.1-0.2)             | 0.1 (0.1-0.1)              | 0.1 (0.1-0.1)              | 0.1 (0.1-0.1)             | < 0.001  |
| Anti-Mi2          | 0.2 (0.1-0.4)             | 0.1 (0.1-0.1)              | 0.1 (0.1-0.2)              | 0.2 (0.2-0.2)             | < 0.001  |
| Anti-NXP2         | 0.1 (0.1-0.2)             | 0.1 (0.1-0.1)              | 0.1 (0.1-0.1)              | 0.1 (0.1-0.2)             | 0.001    |
| Anti-OJ           | 0.2 (0.2-0.3)             | 0.2 (0.2-0.2)              | 0.2 (0.2-0.3)              | 1.0 (0.8-1.5)             | < 0.001  |
| Anti-PL12         | 0.0 (0.0-0.0)             | 0.0 (0.0-0.0)              | 0.0 (0.0-0.0)              | 0.0 (0.0-0.1)             | < 0.001  |
| Anti-PL7          | 0.0 (0.0-0.0)             | 0.0 (0.0-0.0)              | 0.0 (0.0-0.0)              | 0.0 (0.0-0.0)             | 0.006    |
| Anti-SAE          | 0.0 (0.0-0.0)             | 0.0 (0.0-0.0)              | 0.0 (0.0-0.0)              | 0.1 (0.0-0.1)             | < 0.001  |
| Anti-SRP          | 0.1 (0.1-0.3)             | 0.1 (0.1-0.1)              | 0.1 (0.1-0.1)              | 0.1 (0.1-0.2)             | < 0.001  |
| Anti-TIF1y        | 0.2 (0.2-0.2)             | 0.2 (0.2-0.2)              | 0.2 (0.2-0.2)              | 0.2 (0.2-0.2)             | 0.001    |

**Supplementary Table 3.** Comparison of clinical, laboratory and serological features of SLE patients among clusters. Data are shown as median (interquartile range) or number (percentage).

|                   | Cluster 1<br>N=28    | Cluster 2<br>N=23   | Cluster 3<br>N=89   | P      | Pairwise<br>(Corrected)                              |
|-------------------|----------------------|---------------------|---------------------|--------|------------------------------------------------------|
| Age               | 36 (26-43)           | 42 (33-50)          | 40 (35-51)          | 0.044  | C1 vs C2 0.128<br>C1 vs C3 0.042<br>C2 vs C3 0.983   |
| Sex (female)      | 22/28 (78.6)         | 22/23 (95.7)        | 81/89 (89.3)        | 0.1    |                                                      |
| Malar Rash        | 19/28 (67.9)         | 11/23 (47.8)        | 36/89 (40.4)        | 0.04   | C1 vs C2 0.296<br>C1 vs C3 0.033<br>C2 vs C3 0.523   |
| Photosensitivity  | 14/28 (50.0)         | 8/23 (34.8)         | 33/89 (37.1)        | 0.422  |                                                      |
| DLE               | 1/28 (3.6)           | 0/23 (0.0)          | 2/89 (2.2)          | 0.677  |                                                      |
| Oral ulcers       | 4/28 (14.3)          | 3/23 (13.0)         | 6/89 (6.7)          | 0.402  |                                                      |
| Arthritis         | 22/28 (78.6)         | 17/23 (73.9)        | 57/89 (68.6)        | 0.294  |                                                      |
| Raynaud's phen.   | 4/28 (14.3)          | 2/23 (8.7)          | 17/89 (19.1)        | 0.459  |                                                      |
| Serositis         | 6/28 (21.4)          | 4/23 (17.4)         | 12/89 (13.5)        | 0.585  |                                                      |
| Pulmonary         | 1/28 (3.6)           | 0/23 (0.0)          | 3/89 (3.4)          | 0.666  |                                                      |
| PAH               | 0/28 (0.0)           | 0/23 (0.0)          | 1/89 (0.7)          | 0.749  |                                                      |
| Nephritis         | 15/28 (53.6)         | 9/23 (39.1)         | 31/89 (39.3)        | 0.208  |                                                      |
| Myositis          | 0/28 (0.0)           | 1/23 (4.3)          | 1/89 (1.1)          | 0.395  |                                                      |
| PNS               | 0/28 (0.0)           | 1/23 (4.3)          | 4/89 (4.5)          | 0.523  |                                                      |
| Psychosis         | 0/28 (0.0)           | 0/23 (0.0)          | 2/89 (1.4)          | 0.559  |                                                      |
| Seizure           | 0/28 (0.0)           | 1/23 (4.3)          | 5/89 (5.6)          | 0.441  |                                                      |
| Leukopenia        | 16/28 (57.1)         | 9/23 (39.1)         | 27/89 (37.1)        | 0.037  | C1 vs C2 0.4<br>C1 vs C3 0.03<br>C2 vs C3 0.421      |
| Haemolytic anemia | 11/28 (39.3)         | 2/23 (8.7)          | 10/89 (11.2)        | 0.001  | C1 vs C2 0.026<br>C1 vs C3 0.003<br>C2 vs C3 0.725   |
| Thrombocytopenia  | 6/28 (21.4)          | 3/23 (13.0)         | 10/89 (11.2)        | 0.388  |                                                      |
| Low C3            | 25/28 (89.3)         | 7/23 (30.4)         | 38/89 (42.7)        | <0.001 | C1 vs C2 <0.001<br>C1 vs C3 <0.001<br>C2 vs C3 0.285 |
| Low C4            | 17/28 (60.7)         | 7/23 (30.4)         | 24/89 (34.3)        | 0.004  | C1 vs C2 0.062<br>C1 vs C3 0.003<br>C2 vs C3 0.740   |
| Anti-dsDNA        | 21/25 (84.0)         | 11/19 (57.9)        | 41/85 (48.2)        | 0.006  | C1 vs C2 0.108<br>C1 vs C3 0.006<br>C2 vs C3 0.446   |
| ACLA IgG          | 3/23 (13.0)          | 2/16 (12.5)         | 11/71 (15.5)        | 0.963  |                                                      |
| ACLA IgM          | 1/23 (4.3)           | 1/16 (6.3)          | 3/70 (4.3)          | 0.942  |                                                      |
| Anti-β2-gpl IgG   | 2/22 (9.1)           | 1/15 (6.7)          | 9/68 (13.2)         | 0.714  |                                                      |
| Anti-β2-gpl IgM   | 1/22 (4.5)           | 1/15 (6.7)          | 2/68 (2.9)          | 0.776  |                                                      |
| Positive LAC      | 2/18 (11.1)          | 3/16 (18.8)         | 5/55 (11.2)         | 0.560  |                                                      |
| Ongoing GC        | 23/28 (82.1)         | 20/23 (87.0)        | 60/85 (70.6)        | 0.180  |                                                      |
| Ongoing HCQ       | 14/28 (50.0)         | 16/23 (69.6)        | 60/85 (70.6)        | 0.127  |                                                      |
| Ongoing MTX       | 1/28 (3.6)           | 3/23 (13.0)         | 8/84 (9.5)          | 0.470  |                                                      |
| Ongoing AZA       | 2/28 (7.1)           | 1/23 (4.3)          | 10/84 (11.9)        | 0.488  |                                                      |
| ANA titre         | 1:640 (1:160-1:1280) | 1:640 (1:320-1:640) | 1:320 (1:160-1:640) | 0.158  |                                                      |

|                   |                   |                     |                 |         |                                                       |
|-------------------|-------------------|---------------------|-----------------|---------|-------------------------------------------------------|
| Anti-BICD2        | 0.2 (0.1-0.3)     | 0.1 (0.1-0.1)       | 0.1 (0.1-0.1)   | < 0.001 |                                                       |
| Anti-fibrillarin  | 0.5 (0.2-0.6)     | 0.3 (0.2-0.5)       | 0.3 (0.3-0.4)   | 0.1     |                                                       |
| Anti-Ku           | 0.3 (0.1-1.2)     | 0.1 (0.1-0.1)       | 0.1 (0.1-0.2)   | < 0.001 |                                                       |
| Anti-PM1-A        | 0.1 (0.1-0.2)     | 0.1 (0.1-0.1)       | 0.1 (0.1-0.1)   | 0.002   |                                                       |
| Anti-RNA pol III  | 0.2 (0.2-0.2)     | 0.2 (0.2-0.2)       | 0.1 (0.1-0.2)   | < 0.001 |                                                       |
| Anti-Th/To RPP25  | 0.1 (0.1-0.2)     | 0.1 (0.1-0.1)       | 0.1 (0.1-0.1)   | 0.001   |                                                       |
| Anti-Th/To RPP38  | 0.1 (0.1-0.2)     | 0.0 (0.0-0.1)       | 0.1 (0.0-0.1)   | < 0.001 |                                                       |
| Anti-dsDNA        | 103.1 (9.7-116.3) | 4.1 (0.6-13.8)      | 5.5 (1.1-19.6)  | < 0.001 | C1 vs C2 <0.001<br>C1 vs C3 <0.001<br>C2 vs C3 0.449  |
| Anti-RNP          | 5.6 (1.4-182.0)   | 1.0 (0.4-13.1)      | 1.8 (0.3-165.0) | 0.044   | C1 vs C2 0.018<br>C1 vs C3 0.114<br>C2 vs C3 0.411    |
| Anti-Sm           | 1.2 (0.4-67.1)    | 0.3 (0.2-0.7)       | 0.2 (0.1-0.7)   | < 0.001 | C1 vs C2 0.008<br>C1 vs C3 <0.001<br>C2 vs C3 0.093   |
| Anti-Ro52         | 0.9 (0.43-79.0)   | 141.9 (38.5-196.3)  | 0.3 (0.2-0.8)   | < 0.001 | C1 vs C2 <0.001<br>C1 vs C3 <0.001<br>C2 vs C3 <0.001 |
| Anti-Ro60         | 19.7 (1.5-561.4)  | 583.7 (453.5-583.7) | 1.4 (0.4-12.6)  | < 0.001 | C1 vs C2 <0.001<br>C1 vs C3 <0.001<br>C2 vs C3 <0.001 |
| Anti-La           | 2.3 (0.5-11.6)    | 6.8 (2.7-90.4)      | 0.3 (0.2-0.7)   | < 0.001 | C1 vs C2 0.038<br>C1 vs C3 <0.001<br>C2 vs C3 <0.001  |
| Anti-Scl70        | 0.9 (0.4-3.6)     | 0.3 (0.2-0.5)       | 0.3 (0.2-0.5)   | < 0.001 |                                                       |
| Anti-Jo1 (test 1) | 0.1 (0.1-0.3)     | 0.1 (0.1-0.2)       | 0.1 (0.0-0.1)   | < 0.001 |                                                       |
| Anti-CENP         | 0.9 (0.6-1.1)     | 0.7 (0.4-0.9)       | 0.4 (0.2-0.6)   | < 0.001 |                                                       |
| Anti-DFS70        | 0.1 (0.1-0.1)     | 0.1 (0.1-0.2)       | 0.1 (0.0-0.1)   | 0.938   |                                                       |
| Anti-Rib P        | 2.1 (0.23-61.4)   | 0.4 (0.1-1.2)       | 0.2 (0.2-1.4)   | 0.003   | C1 vs C2 0.028<br>C1 vs C3 0.003<br>C2 vs C3 0.781    |
| Anti-EJ           | 0.1 (0.1-0.3)     | 0.1 (0.1-0.1)       | 0.1 (0.1-0.1)   | < 0.001 |                                                       |
| Anti-HMGCR        | 0.1 (0.1-0.1)     | 0.1 (0.0-0.1)       | 0.1 (0.0-0.1)   | 0.059   |                                                       |
| Anti-Jo1 (test 2) | 0.1 (0.0-0.1)     | 0.0 (0.0-0.0)       | 0.0 (0.0-0.0)   | < 0.001 |                                                       |
| Anti-MDA5         | 0.1 (0.1-0.2)     | 0.1 (0.1-0.1)       | 0.1 (0.1-0.1)   | 0.006   |                                                       |
| Anti-Mi2          | 0.2 (0.1-0.5)     | 0.1 (0.1-0.2)       | 0.1 (0.1-0.2)   | < 0.001 |                                                       |
| Anti-NXP2         | 0.2 (0.1-0.3)     | 0.1 (0.1-0.1)       | 0.1 (0.1-0.1)   | 0.003   |                                                       |
| Anti-OJ           | 0.3 (0.2-0.3)     | 0.2 (0.2-0.3)       | 0.2 (0.2-0.2)   | 0.01    |                                                       |
| Anti-PL12         | 0.0 (0.0-0.0)     | 0.0 (0.0-0.0)       | 0.0 (0.0-0.0)   | 0.249   |                                                       |
| Anti-PL7          | 0.0 (0.0-0.0)     | 0.0 (0.0-0.0)       | 0.0 (0.0-0.0)   | 0.275   |                                                       |
| Anti-SAE          | 0.0 (0.0-0.0)     | 0.0 (0.0-0.0)       | 0.0 (0.0-0.0)   | 0.705   |                                                       |
| Anti-SRP          | 0.1 (0.1-0.4)     | 0.1 (0.1-0.1)       | 0.1 (0.1-0.1)   | < 0.001 |                                                       |
| Anti-TIF1y        | 0.2 (0.2-0.3)     | 0.2 (0.2-0.2)       | 0.2 (0.2-0.2)   | < 0.001 |                                                       |

**Supplementary Table 4.** Comparison of clinical, laboratory and serological features of SJS patients among clusters. Data are shown as median (interquartile range) or number (percentage).

|                      | Cluster 1<br>N=7 | Cluster 2<br>N=129  | Cluster 3<br>N=110  | P      |
|----------------------|------------------|---------------------|---------------------|--------|
| Age                  |                  | 55 (46-69)          | 64 (54-71)          | <0.001 |
| Sex (female)         |                  | 125/129 (96.9)      | 105/110 (95.5)      | 0.736  |
| Xerostomia           |                  | 112/129 (86.8)      | 105/110 (95.5)      | 0.021  |
| Xerophthalmia        |                  | 118/129 (91.5)      | 104/110 (94.5)      | 0.357  |
| Glandular swelling   |                  | 36/129 (27.9)       | 15/110 (13.6)       | 0.007  |
| Purpura              |                  | 15/129 (11.6)       | 0/110 (0.0)         | <0.001 |
| Arthritis            |                  | 78/129 (60.5)       | 42/110 (38.2)       | 0.001  |
| Raynaud's phen.      |                  | 35/129 (27.1)       | 28/110 (25.5)       | 0.769  |
| Serositis            |                  | 0/129 (0.0)         | 1/110 (0.9)         | 0.460  |
| Pulmonary            |                  | 7/129 (5.4)         | 11/110 (7.7)        | 0.182  |
| PAH                  |                  | 0/129 (0.0)         | 0/110 (0.0)         |        |
| GMN                  |                  | 3/126 (2.3)         | 2/108 (1.8)         | 1.000  |
| TIN                  |                  | 2/129 (1.6)         | 0/110 (0.0)         | 0.501  |
| Myositis             |                  | 2/129 (1.6)         | 1/110 (0.9)         | 1.000  |
| CNS                  |                  | 2/129 (1.6)         | 2/110 (1.8)         | 1.000  |
| PNS                  |                  | 5/129 (3.9)         | 3/107 (2.7)         | 0.729  |
| Thyroiditis          |                  | 37/92 (28.7)        | 39/71 (35.5)        | 0.262  |
| Hepatic              |                  | 2/127 (1.6)         | 3/107 (2.7)         | 0.664  |
| Leukopenia           |                  | 37/129 (28.7)       | 15/110 (13.6)       | 0.005  |
| Hypergammagl.        |                  | 85/129 (65.9)       | 29/110 (26.4)       | <0.001 |
| Cryoglobulinaemia    |                  | 6/129 (4.7)         | 0/110 (0.0)         | 0.032  |
| Monoclonal component |                  | 13/129 (10.1)       | 9/110 (8.2)         | 0.613  |
| Lymphoma             |                  | 3/129 (2.3)         | 0/110 (0.0)         | 0.252  |
| Low C3               |                  | 21/129 (16.3)       | 5/110 (4.5)         | 0.004  |
| Low C4               |                  | 20/129 (15.5)       | 2/110 (1.8)         | <0.001 |
| RF                   |                  | 53/129 (41.1)       | 25/110 (22.7)       | 0.003  |
| Ongoing GC           |                  | 69/129 (53.5)       | 51/110 (46.4)       | 0.272  |
| Ongoing HCQ          |                  | 84/129 (65.1)       | 59/110 (53.6)       | 0.071  |
| Ongoing MTX          |                  | 6/129 (4.7)         | 9/110 (8.2)         | 0.262  |
| Ongoing AZA          |                  | 7/129 (5.4)         | 2/110 (1.8)         | 0.184  |
| Ongoing RTX          |                  | 7/129 (5.4)         | 1/110 (0.9)         | 0.073  |
| ANA positivity       |                  | 120/120 (100)       | 79 /101 (78.2)      | <0.001 |
| ANA titre            |                  | 1:640 (1:640-1:640) | 1:640 (1:320-1:640) | 0.541  |
| Anti-BICD2           |                  | 0.1 (0.1-0.1)       | 0.1 (0.1-0.1)       | 0.122  |
| Anti-fibrillarin     |                  | 0.3 (0.2-0.4)       | 0.3 (0.2-0.4)       | 0.886  |
| Anti-Ku              |                  | 0.1 (0.1-0.1)       | 0.1 (0.1-0.1)       | 0.191  |
| Anti-PM1-A           |                  | 0.1 (0.1-0.1)       | 0.1 (0.1-0.1)       | 0.882  |
| Anti-RNA pol III     |                  | 0.1 (0.1-0.2)       | 0.1 (0.1-0.2)       | 0.753  |
| Anti-Th/To RPP25     |                  | 0.1 (0.1-0.1)       | 0.1 (0.1-0.1)       | 0.471  |
| Anti-Th/To RPP38     |                  | 0.0 (0.0-0.1)       | 0.0 (0.0-0.1)       | 0.722  |
| Anti-dsDNA           |                  | 0.4 (0.2-1.0)       | 0.4 (0.2-0.7)       | 0.116  |
| Anti-RNP             |                  | 0.3 (0.2-0.6)       | 0.1 (0.1-0.6)       | <0.001 |
| Anti-Sm              |                  | 0.3 (0.2-0.3)       | 0.2 (0.1-0.2)       | <0.001 |

|                    |  |                     |                |        |
|--------------------|--|---------------------|----------------|--------|
| Anti-Ro52          |  | 196.3 (196.3-196.3) | 0.4 (0.1-6.3)  | <0.001 |
| Anti-Ro60          |  | 583.7 (371.9-583.7) | 0.7 (0.2-31.9) | <0.001 |
| Anti-La            |  | 42.9 (11.5-195.8)   | 0.3 (0.1-0.4)  | <0.001 |
| Anti-Scl70         |  | 0.3 (0.2-0.4)       | 0.2 (0.1-0.4)  | 0.117  |
| Anti-Jo1 (test 1)  |  | 0.1 (0.1-0.1)       | 0.1 (0.0-0.1)  | <0.001 |
| Anti-CENP          |  | 0.6 (0.4-0.9)       | 0.4 (0.2-0.8)  | 0.008  |
| Anti-DFS70         |  | 0.1 (0.0-0.1)       | 0.1 (0.0-0.1)  | 0.755  |
| Anti-Rib P         |  | 0.1 (0.1-0.2)       | 0.1 (0.1-0.2)  | 0.001  |
| Anti-EJ            |  | 0.1 (0.1-0.1)       | 0.1 (0.1-0.1)  | 0.991  |
| Anti-HMGCR         |  | 0.1 (0.0-0.1)       | 0.1 (0.1-0.1)  | 0.140  |
| Anti-Jo1 (test 2)  |  | 0.0 (0.0-0.0)       | 0.0 (0.0-0.0)  | 0.354  |
| Anti-MDA5          |  | 0.1 (0.1-0.1)       | 0.1 (0.1-0.1)  | 0.778  |
| Anti-Mi2           |  | 0.1 (0.1-0.1)       | 0.1 (0.1-0.1)  | 0.632  |
| Anti-NXP2          |  | 0.1 (0.1-0.1)       | 0.1 (0.1-0.1)  | 0.623  |
| Anti-OJ            |  | 0.2 (0.2-0.2)       | 0.2 (0.2-0.2)  | 0.977  |
| Anti-PL12          |  | 0.0 (0.0-0.0)       | 0.0 (0.0-0.0)  | 0.396  |
| Anti-PL7           |  | 0.0 (0.0-0.0)       | 0.0 (0.0-0.0)  | 0.910  |
| Anti-SAE           |  | 0.0 (0.0-0.0)       | 0.0 (0.0-0.0)  | 0.977  |
| Anti-SRP           |  | 0.1 (0.1-0.1)       | 0.0 (0.0-0.1)  | 0.228  |
| Anti-TIF1 $\gamma$ |  | 0.2 (0.2-0.2)       | 0.2 (0.2-0.2)  | 0.254  |

**Supplementary Table 5.** Comparison of clinical, laboratory and serological features of UCTD patients among clusters. Data are shown as median (interquartile range) or number (percentage).

|                   | Cluster 1<br>N=3 | Cluster 2<br>N=18   | Cluster 3<br>N=76   | P      |
|-------------------|------------------|---------------------|---------------------|--------|
| Age               |                  | 46 (35-51)          | 38 (31-49)          | 0.563  |
| Sex (female)      |                  | 16/18 (88.9)        | 70/76 (92.1)        | 0.646  |
| Xerostomia        |                  | 4/18 (22.2)         | 19/76 (25.0)        | 1.000  |
| Xerophthalmia     |                  | 3/18 (16.7)         | 20/76 (26.3)        | 0.546  |
| Arthritis         |                  | 13/18 (72.2)        | 50/76 (65.8)        | 0.602  |
| Raynaud's phen.   |                  | 6/18 (33.3)         | 35/76 (46.1)        | 0.328  |
| Serositis         |                  | 1/18 (5.6)          | 3/73 (3.9)          | 0.579  |
| Leukopenia        |                  | 8/18 (44.4)         | 17/76 (22.4)        | 0.076  |
| Thrombocytopenia  |                  | 2/18 (11.1)         | 8/76 (10.5)         | 1.000  |
| Hypergammagl.     |                  | 9/18 (50.0)         | 17/76 (22.4)        | 0.037  |
| Low C3            |                  | 1/17 (5.6)          | 10/76 (13.2)        | 0.684  |
| Low C4            |                  | 0/18 (0.0)          | 3/76 (3.9)          | 1.000  |
| Ongoing GC        |                  | 5/18 (27.8)         | 23/76 (30.3)        | 0.836  |
| Ongoing HCQ       |                  | 11/18 (61.1)        | 51/76 (67.1)        | 0.629  |
| Ongoing MTX       |                  | 2/18 (11.1)         | 5/76 (6.6)          | 0.616  |
| ANA positivity    |                  | 18/18 (100)         | 76/76 (100)         | n/a    |
| ANA titre         |                  | 1:320 (1:320-1:960) | 1:480 (1:160-1:640) | 0.795  |
| Anti-BICD2        |                  | 0.1 (0.1-0.1)       | 0.1 (0.1-0.1)       | 0.706  |
| Anti-fibrillar    |                  | 0.3 (0.3-0.5)       | 0.3 (0.2-0.4)       | 0.296  |
| Anti-Ku           |                  | 0.1 (0.1-0.2)       | 0.1 (0.1-0.1)       | 0.649  |
| Anti-PM1-A        |                  | 0.1 (0.1-0.1)       | 0.1 (0.1-0.2)       | 0.456  |
| Anti-RNA pol III  |                  | 0.2 (0.1-0.2)       | 0.1 (0.1-0.2)       | 0.023  |
| Anti-Th/To RPP25  |                  | 0.1 (0.1-0.1)       | 0.2 (0.1-0.1)       | 0.489  |
| Anti-Th/To RPP38  |                  | 0.1 (0.1-0.1)       | 0.0 (0.0-0.1)       | 0.005  |
| Anti-dsDNA        |                  | 2.4 (0.5-10.4)      | 1.0 (0.3-2.8)       | 0.041  |
| Anti-RNP          |                  | 0.4 (0.2-0.8)       | 0.2 (0.1-1.7)       | 0.125  |
| Anti-Sm           |                  | 0.3 (0.2-0.4)       | 0.2 (0.1-0.2)       | 0.001  |
| Anti-Ro52         |                  | 196.3 (53.5-196.3)  | 0.2 (0.1-0.5)       | <0.001 |
| Anti-Ro60         |                  | 583.7 (449.2-583.7) | 0.4 (0.1-6.0)       | <0.001 |
| Anti-La           |                  | 15.5 (1.8-195.8)    | 0.3 (0.1-0.6)       | <0.001 |
| Anti-Scl70        |                  | 0.3 (0.2-0.6)       | 0.3 (0.2-0.7)       | 0.550  |
| Anti-Jo1 (test 1) |                  | 0.1 (0.1-0.1)       | 0.1 (0.0-0.1)       | 0.418  |
| Anti-CENP         |                  | 0.6 (0.3-1.2)       | 0.3 (0.2-0.6)       | 0.137  |
| Anti-DFS70        |                  | 0.1 (0.0-0.1)       | 0.1 (0.0-0.1)       | 0.573  |
| Anti-Rib P        |                  | 0.2 (0.1-0.3)       | 0.1 (0.1-0.3)       | 0.133  |
| Anti-EJ           |                  | 0.1 (0.1-0.1)       | 0.1 (0.1-0.1)       | 0.736  |
| Anti-HMGCR        |                  | 0.1 (0.1-0.1)       | 0.1 (0.1-0.1)       | 0.719  |
| Anti-Jo1 (test 2) |                  | 0.0 (0.0-0.1)       | 0.0 (0.0-0.0)       | 0.424  |
| Anti-MDA5         |                  | 0.1 (0.1-0.1)       | 0.1 (0.1-0.1)       | 0.629  |
| Anti-Mi2          |                  | 0.2 (0.1-0.2)       | 0.1 (0.1-0.2)       | 0.177  |
| Anti-NXP2         |                  | 0.1 (0.1-0.1)       | 0.1 (0.1-0.1)       | 0.284  |
| Anti-OJ           |                  | 0.2 (0.2-0.2)       | 0.2 (0.2-0.3)       | 0.438  |
| Anti-PL12         |                  | 0.0 (0.0-0.0)       | 0.0 (0.0-0.0)       | 0.04   |
| Anti-PL7          |                  | 0.0 (0.0-0.0)       | 0.0 (0.0-0.0)       | 1.000  |

|                    |  |               |               |       |
|--------------------|--|---------------|---------------|-------|
| Anti-SAE           |  | 0.0 (0.0-0.0) | 0.0 (0.0-0.0) | 0.258 |
| Anti-SRP           |  | 0.1 (0.1-0.1) | 0.1 (0.1-0.1) | 0.14  |
| Anti-TIF1 $\gamma$ |  | 0.2 (0.2-0.2) | 0.2 (0.2-0.2) | 0.921 |



**Supplementary Table 6.** Comparison of clinical, laboratory and serological features of IIM patients among clusters. Data are shown as median (interquartile range) or number (percentage).

|                   | Cluster 1<br>N=3 | Cluster 2<br>N=2 | Cluster 3<br>N=74   | Cluster 4<br>N=21   | P      |
|-------------------|------------------|------------------|---------------------|---------------------|--------|
| Age               |                  |                  | 59 (52-69)          | 55 (48-70)          | 0.456  |
| Sex (female)      |                  |                  | 58/74 (78.4)        | 15/21 (71.4)        | 0.561  |
| Heliotrope Rash   |                  |                  | 29/74 (39.2)        | 4/21 (19.0)         | 0.087  |
| Gottron's papules |                  |                  | 29/74 (39.2)        | 2/21 (9.5)          | 0.01   |
| Mechanic's Hands  |                  |                  | 12/74 (16.2)        | 6/21 (28.6)         | 0.217  |
| Fever             |                  |                  | 10/74 (13.5)        | 10/21 (47.6)        | 0.002  |
| Arthritis         |                  |                  | 26/74 (35.1)        | 18/21 (85.7)        | <0.001 |
| Raynaud's phen.   |                  |                  | 12/74 (16.2)        | 8/21 (38.1)         | 0.038  |
| Serositis         |                  |                  | 1/74 (1.4)          | 2/21 (9.5)          | 0.122  |
| Myositis          |                  |                  | 57/74 (77.0)        | 12/21 (57.1)        | 0.071  |
| Calcinosis        |                  |                  | 2/74 (2.7)          | 0/21 (0.0)          | 1.000  |
| Cancer            |                  |                  | 3/74 (4.1)          | 0/21 (0.0)          | 1.000  |
| Ongoing GC        |                  |                  | 59/74 (79.7)        | 18/21 (85.7)        | 0.754  |
| Ongoing MMF       |                  |                  | 13/74 (17.6)        | 9/21 (42.9)         | 0.021  |
| Ongoing MTX       |                  |                  | 29/74 (39.2)        | 3/21 (14.3)         | 0.033  |
| Ongoing CYC       |                  |                  | 1/74 (1.4)          | 0/21 (0.0)          | 1.000  |
| Ongoing RTX       |                  |                  | 10/74 (13.5)        | 5/21 (23.8)         | 0.31   |
| Ongoing AZA       |                  |                  | 18/74 (24.3)        | 2/21 (9.5)          | 0.225  |
| ANA positivity    |                  |                  | 64/70 (91.4)        | 12/17 (70.6)        | 0.035  |
| ANA titre         |                  |                  | 1:320 (1:160-1:640) | 1:160 (1:160-1:320) | 0.12   |
| Anti-BICD2        |                  |                  | 0.1 (0.1-0.1)       | 0.1 (0.1-0.1)       | 0.348  |
| Anti-fibrillarin  |                  |                  | 0.3 (0.2-0.4)       | 0.3 (0.2-0.5)       | 0.309  |
| Anti-Ku           |                  |                  | 0.1 (0.1-0.1)       | 0.1 (0.1-0.1)       | 0.252  |
| Anti-PM1-A        |                  |                  | 0.1 (0.1-0.1)       | 0.1 (0.1-0.2)       | 0.577  |
| Anti-RNA pol III  |                  |                  | 0.1 (0.1-0.2)       | 0.1 (0.1-0.1)       | 0.432  |
| Anti-Th/To RPP25  |                  |                  | 0.1 (0.1-0.1)       | 0.1 (0.1-0.1)       | 1.000  |
| Anti-Th/To RPP38  |                  |                  | 0.0 (0.0-0.1)       | 0.0 (0.0-0.1)       | 0.961  |
| Anti-dsDNA        |                  |                  | 0.3 (0.1-0.7)       | 0.3 (0.2-0.7)       | 0.807  |
| Anti-RNP          |                  |                  | 0.2 (0.1-0.3)       | 0.1 (0.1-0.3)       | 0.707  |
| Anti-Sm           |                  |                  | 0.1 (0.1-0.2)       | 0.2 (0.1-0.2)       | 0.07   |
| Anti-Ro52         |                  |                  | 0.2 (0.1-0.6)       | 8.6 (0.3-161.9)     | <0.001 |
| Anti-Ro60         |                  |                  | 0.2 (0.1-0.8)       | 0.5 (0.1-4.7)       | 0.33   |
| Anti-La           |                  |                  | 0.2 (0.1-0.3)       | 0.2 (0.2-0.6)       | 0.281  |
| Anti-Scl70        |                  |                  | 0.2 (0.1-0.5)       | 0.2 (0.2-0.4)       | 0.884  |
| Anti-Jo1 (test 1) |                  |                  | 0.1 (0.0-0.1)       | 153.6 (153.6-153.6) | <0.001 |
| Anti-CENP         |                  |                  | 0.3 (0.2-0.7)       | 0.4 (0.2-1.1)       | 0.176  |
| Anti-DFS70        |                  |                  | 0.1 (0.0-0.5)       | 0.1 (0.0-0.2)       | 0.695  |
| Anti-Rib P        |                  |                  | 0.1 (0.1-0.2)       | 0.1 (0.1-0.2)       | 0.636  |
| Anti-EJ           |                  |                  | 0.1 (0.1-0.1)       | 0.1 (0.1-0.2)       | 0.127  |
| Anti-HMGCR        |                  |                  | 0.1 (0.1-0.1)       | 0.1 (0.1-0.1)       | 0.97   |

|                    |  |  |               |                 |        |
|--------------------|--|--|---------------|-----------------|--------|
| Anti-Jo1 (test 2)  |  |  | 0.0 (0.0-0.0) | 10.7 (8.8-11.5) | <0.001 |
| Anti-MDA5          |  |  | 0.1 (0.1-0.1) | 0.1 (0.1-0.1)   | 0.804  |
| Anti-Mi2           |  |  | 0.1 (0.1-0.2) | 0.2 (0.2-0.2)   | 0.026  |
| Anti-NXP2          |  |  | 0.1 (0.1-0.2) | 0.2 (0.1-0.2)   | 0.413  |
| Anti-OJ            |  |  | 0.2 (0.2-0.3) | 1.0 (0.8-1.5)   | <0.001 |
| Anti-PL12          |  |  | 0.0 (0.0-0.0) | 0.0 (0.0-0.1)   | <0.001 |
| Anti-PL7           |  |  | 0.0 (0.0-0.0) | 0.0 (0.0-0.0)   | 0.646  |
| Anti-SAE           |  |  | 0.0 (0.0-0.0) | 0.1 (0.0-0.1)   | <0.001 |
| Anti-SRP           |  |  | 0.0 (0.0-0.1) | 0.1 (0.1-0.2)   | <0.001 |
| Anti-TIF1 $\gamma$ |  |  | 0.2 (0.2-0.2) | 0.2 (0.2-0.2)   | 0.257  |
